# Supplementary material for: Hydroxyproline O‐arabinosyltransferase mutants oppositely alter tip growth in Arabidopsis thaliana and Physcomitrella patens
Source: PubMed Central journal article supplement — Plant J. 2015 Dec 27;85(2):193–208. doi: 10.1111/tpj.13079 (PMC4738400; doi:10.1111/tpj.13079), 2015-12-27
Supplement: TPJ-85-193-s011.pdf [file TPJ-85-193-s011.pdf]

| <b>Female parent</b> | <b>Male parent</b>   | <b>Progeny carrying mutation</b> | <b>N</b> | <b>X<sup>2</sup> P-value</b> |
|----------------------|----------------------|----------------------------------|----------|------------------------------|
| <i>hpat1/+ hpat3</i> | WT                   | 46.4%                            | 112      | 0.45                         |
| WT                   | <i>hpat1/+ hpat3</i> | 2.7%                             | 75       | 2.40E-16                     |
| WT                   | <i>hpat3/+</i>       | 45.5%                            | 163      | 0.26                         |
| WT                   | <i>hpat1/+</i>       | 55.7%                            | 172      | 0.14                         |
